# Supplementary material for: What Do Neighbors Tell About You: The Local Context of Cis-Regulatory Modules Complicates Prediction of Regulatory Variants
Source: PubMed Central journal article supplement (PMC6834773; doi:10.3389/fgene.2019.01078), 2019-10-31
Supplement: Image_1.pdf [file Image_1.pdf]

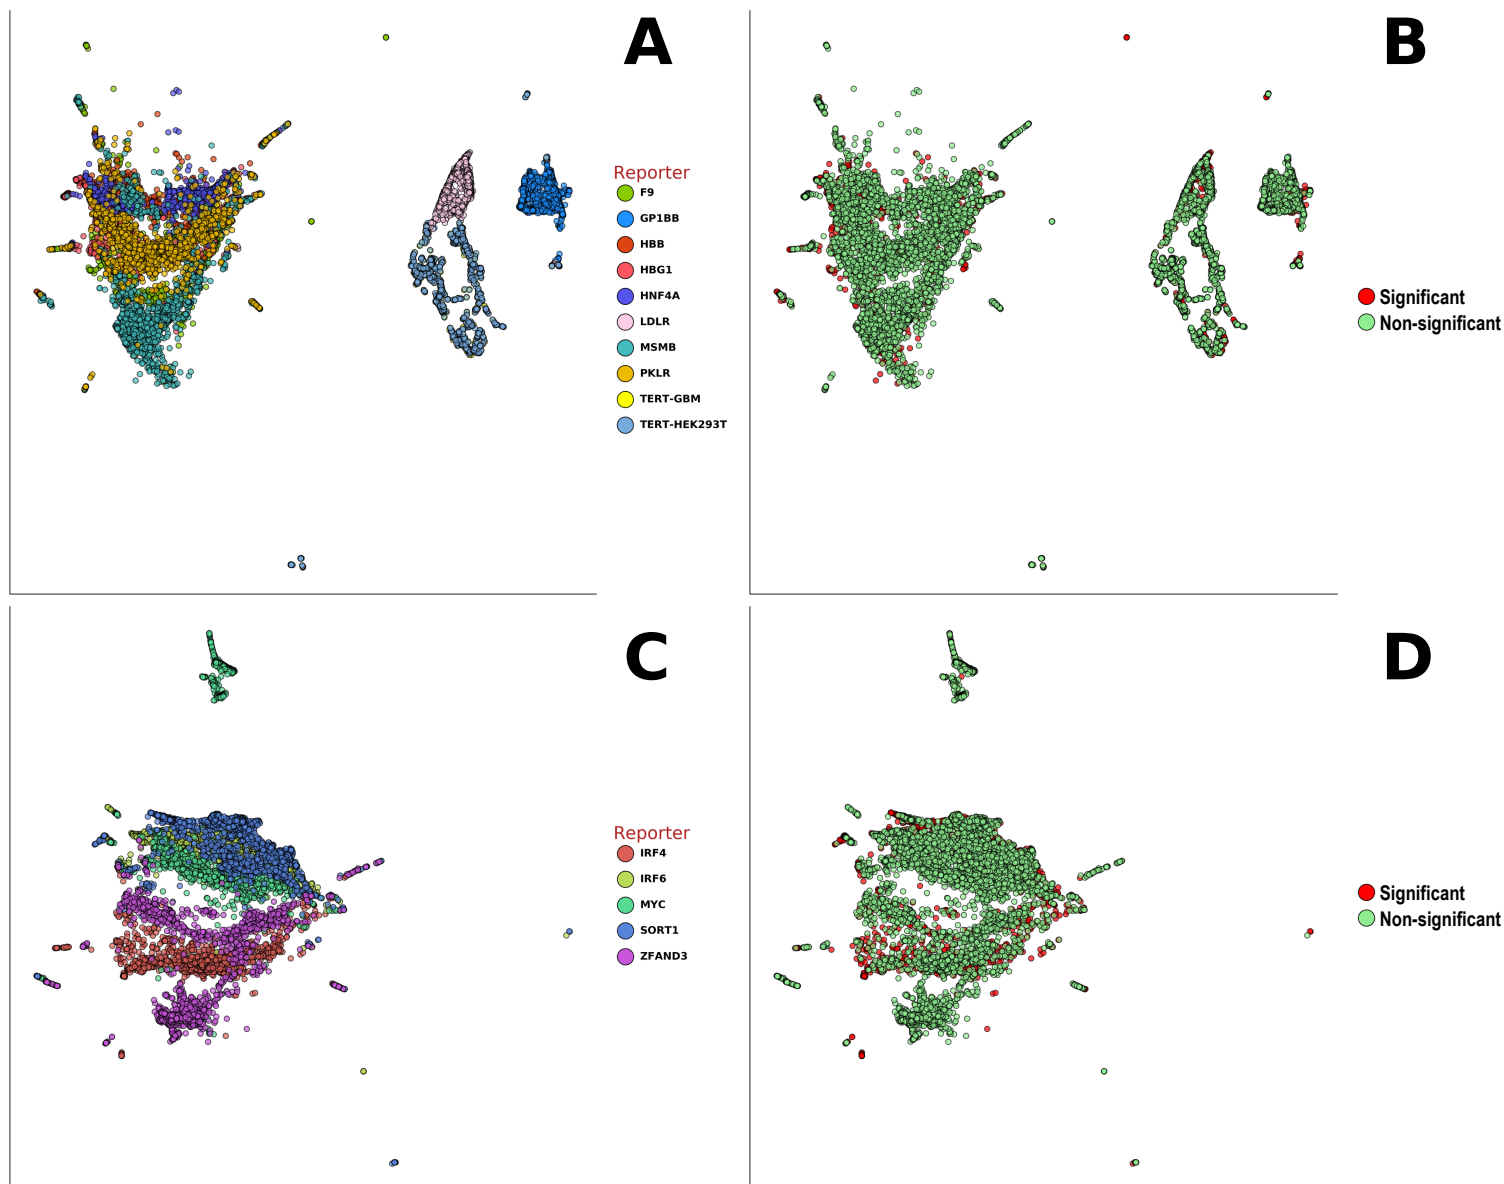

**Supplementary Figure 1.** SNVs in promoters (A, B) and in enhancers (C, D) in the two-dimensional UMAP space. The plots illustrate clear separation of reporters, while significant regulatory SNVs are non-trivially mixed with the non-significant SNVs. The SNVs of the MYC reporter are arranged in two distant clusters, which is probably linked to its unusual behavior in holdout tests.
