# Supplementary material for: What Do Neighbors Tell About You: The Local Context of Cis-Regulatory Modules Complicates Prediction of Regulatory Variants
Source: PubMed Central journal article supplement (PMC6834773; doi:10.3389/fgene.2019.01078), 2019-10-31
Supplement: Image_2.pdf [file Image_2.pdf]

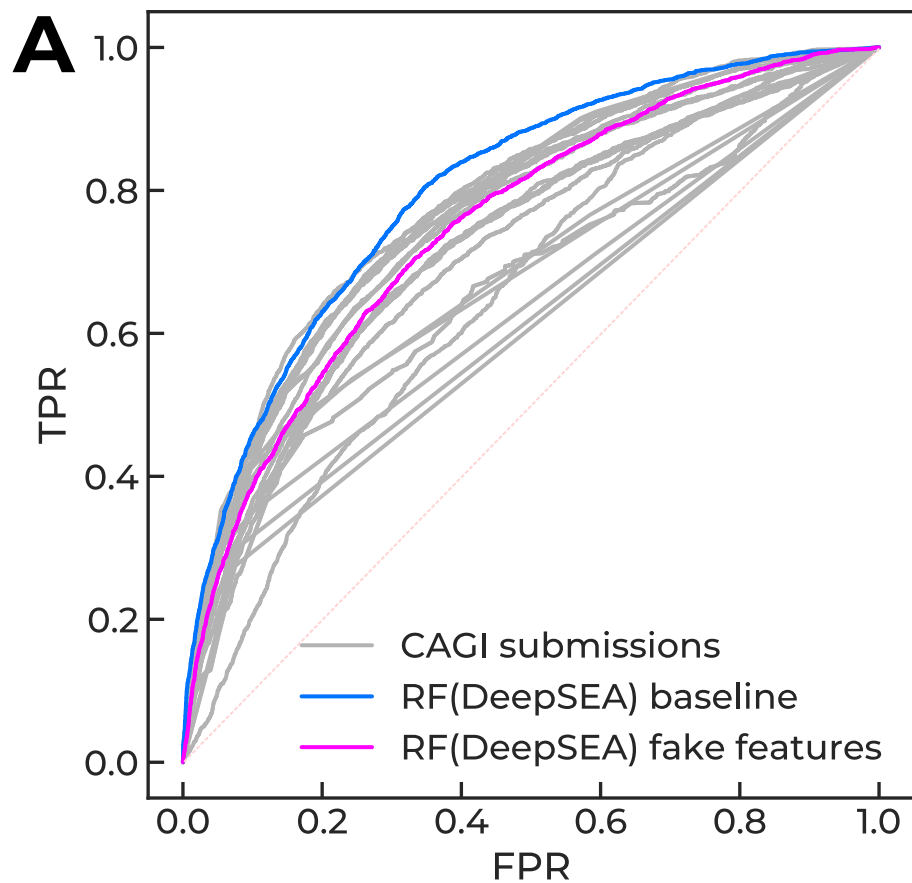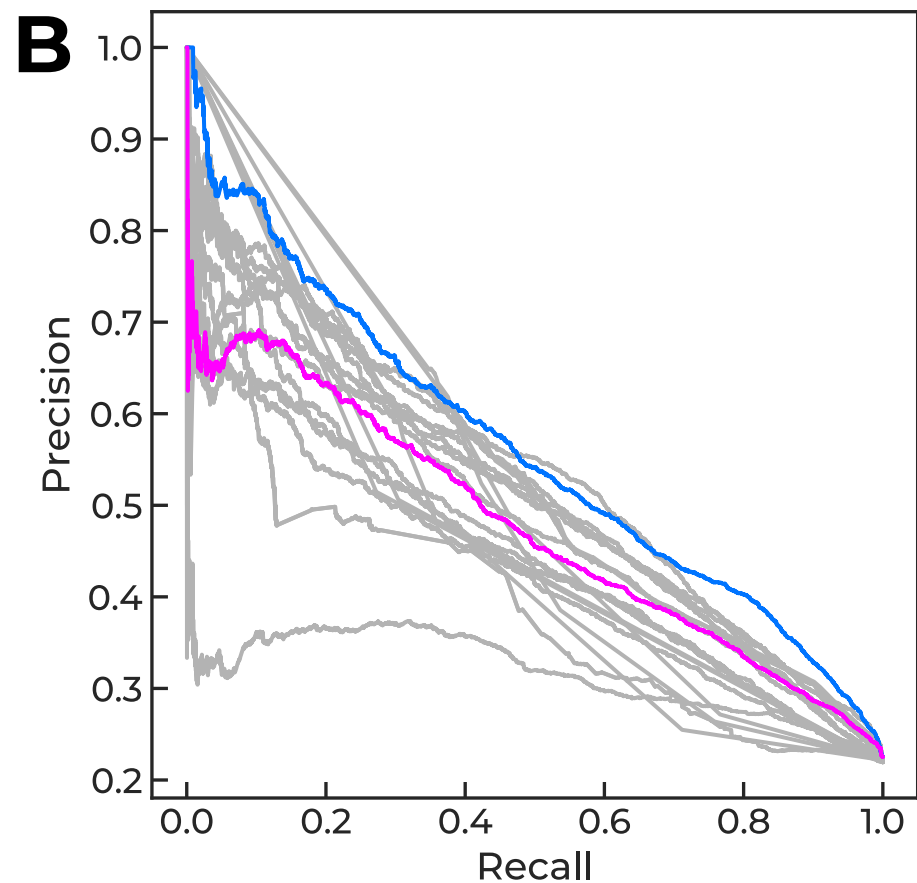

**Supplementary Figure 2.** Non-relevant features allow reaching good prediction quality. (A) Receiver operating characteristics, (B) Precision-recall curves.

Blue, the baseline model (Random Forest atop real DeepSEA features);  
Magenta, the irrelevant baseline model  
(Random Forest atop alien DeepSEA features from non-relevant genomic regions of chr3);  
Grey, the CAGI submissions.
